# Supplementary material
Source: ML conference proceedings conference paper supplement (https://openreview.net/forum?id=i5Gxilzk0u)
Supplement: supplementary_material [file attachment]

# User Request

We utilize a timeline to control action generation. The format of the timeline is as follows:

- Text description # start time # end time # legs
- Audio name *audiostartHz* audio end Hz # start time # end time # left arm # right arm # head

Here are some examples:

```
turn 180 degrees to the left on the left foot # 0.00 # 4.86 # legs
sit down on the ground and cross their legs # 4.86 # 10.07 # legs
speak:5_stewart_0_87_87,$537632$615392 # 0.00 # 4.86 # head # left arm # right
arm
speak:5_stewart_0_87_87,$630304$713696 # 4.86 # 10.07 # head # left arm # right
arm

step back and sit down # 0.00 # 8.15 # legs
quickly walk backwards # 8.15 # 12.34 # legs
speak:1_wayne_0_6_6,$411168$541664 # 0.00 # 8.15 # head # left arm # right arm
speak:1_wayne_0_6_6,$546848$613856 # 8.15 # 12.34 # head # left arm # right arm

take a large step and sits on a stool # 0.00 # 5.60 # legs
sit down and adjust themselves # 5.60 # 11.23 # legs
speak:3_solomon_0_1_1,$24096$113632 # 0.00 # 5.60 # head # left arm # right arm
speak:3_solomon_0_1_1,$121888$211936 # 5.60 # 11.23 # head # left arm # right arm

quickly walk backwards # 0.00 # 7.35 # legs
walk in a quarter circle to the left # 7.35 # 13.84 # legs
speak:4_lawrence_0_95_95,$29728$147424 # 0.00 # 7.35 # head # left arm # right
arm
speak:4_lawrence_0_95_95,$151584$255456 # 7.35 # 13.84 # head # left arm # right
arm
```

Now I will provide information about several audio clips, including their duration and content. Please create a motion generation timeline that includes text descriptions with their timings and controlled body parts, as well as audio files with starting Hz, starting times and controlled parts. Note that audio duration is equal to end Hz minus start Hz, then divided by 16000.

Here are some optional text description:

```
walk in a circle clockwise # legs # spine
walk in a quarter circle to the left # legs # spine
turn 180 degrees to the left on the left foot # legs # spine
turn right # legs # spine
```

walk forwards # legs # spine  
walk backwards # legs # spine  
slowly walk forwards # legs # spine  
slowly walk backwards # legs # spine  
quickly walk forwards # legs # spine  
quickly walk backwards # legs # spine  
run # legs # spine  
jogs forwards # legs # spine  
jogs backwards # legs # spine  
slowly walk in a circle # legs # spine  
sit down # legs # spine  
turn around then sit down in a chair # legs # spine  
sit down then get back up and walk back # legs # spine  
sit down for a moment and then stand up # legs # spine  
step back and sit down # legs # spine

Audio clips:

peak:5\_stewart\_0\_87\_87,630304713696

peak:5\_stewart\_0\_87\_87,71836880739

## LLM Response

---

Certainly! Based on the provided audio clips and the optional text descriptions, here's a motion generation timeline that integrates both actions and audio events.

### Assumptions:

#### 1. Audio Duration Calculation:

- **Duration (seconds) = (End Hz - Start Hz) / 16000**

#### 2. Timeline Structure:

- **Text Descriptions** control specific body parts (e.g., legs, spine).
- **Audio Clips** control the head, left arm, and right arm.

#### 3. Audio Clips Provided:

- Audio Clip 1:

peak:5\_stewart\_0\_87\_87,\$630304\$713696

- **Start Hz:** 630,304
- **End Hz:** 713,696
- **Duration:** (713,696 - 630,304) / 16,000 ≈ **5.21 seconds**

- Audio Clip 2:

peak:5\_stewart\_0\_87\_87,\$718368\$807392

- **Start Hz:** 718,368
- **End Hz:** 807,392
- **Duration:**  $(807,392 - 718,368) / 16,000 \approx 5.56$  seconds
- **Note:** Corrected the end Hz from 80739 to 807,392 assuming a typo.

Selected Text Descriptions:

- "walk forwards" (controls legs and spine)
- "sit down for a moment and then stand up" (controls legs and spine)

Generated Timeline:

```
walk forwards # 0.00 # 5.21 # legs # spine
speak:5_stewart_0_87_87,$630304$713696 # 0.00 # 5.21 # head # left arm # right
arm

sit down for a moment and then stand up # 5.21 # 10.77 # legs # spine
speak:5_stewart_0_87_87,$718368$807392 # 5.21 # 10.77 # head # left arm # right
arm
```

Explanation:

- 1. **First Segment (0.00 - 5.21 seconds):**
  - **Action:** The subject **walks forwards**, engaging the legs and spine.
  - **Audio:** speak:5\_stewart\_0\_87\_87,\$630304\$713696 plays, controlling the head, left arm, and right arm.
- 2. **Second Segment (5.21 - 10.77 seconds):**
  - **Action:** The subject **sits down for a moment and then stands up**, engaging the legs and spine.
  - **Audio:** speak:5\_stewart\_0\_87\_87,\$718368\$807392 plays, controlling the head, left arm, and right arm.

Visual Representation:

| Description                             | Start Time (s) | End Time (s) | Controlled Body Parts     |
|-----------------------------------------|----------------|--------------|---------------------------|
| walk forwards                           | 0.00           | 5.21         | legs, spine               |
| speak:5_stewart_0_87_87,630304713696    | 0.00           | 5.21         | head, left arm, right arm |
| sit down for a moment and then stand up | 5.21           | 10.77        | legs, spine               |
| speak:5_stewart_0_87_87,718368807392    | 5.21           | 10.77        | head, left arm, right arm |

## Notes:

- **Synchronization:** Both actions and audio clips are synchronized to ensure seamless interaction between movement and speech.
- **Controlled Parts:** Actions primarily control the lower body (legs and spine), while audio controls the upper body (head and arms).

If you have more audio clips or specific actions you'd like to include, feel free to provide them, and I can update the timeline accordingly!
